# Supplementary material for: Comparison of Statistical Methods for Estimating Continuous Paediatric Reference Intervals: A Simulation Study
Source: Research Square preprint supplement (doi:10.21203/rs.3.rs-144805/v1), 2021-01-16
Supplement: Supplementary file 2 [file 71e054cd46f4b26370ba252c.docx]

**Supplementary document 1: Stata and R codes of all four statistical methods applied in estimating age-specific paediatric RIs (**Monsurul Hoq Susan Donath,Paul Monagle, John B. Carlin Comparison of statistical methods for estimating continuous paediatric reference intervals: a simulation study)

***1-A: Stata Code for Royston’s method***

*** Developed by Monsurul Hoq for the purpose of the comparing four methods for estimating continuous RI.**

*** The following program is applicable for estimating RIs (2.5th - 97.5th) using age and sex (where 1 = Male and 0 = Female).**

*** A brief discussion of the method is include in the masnucript.**

*** Further details including "xrigls" and "xriml" can be found in Royston *et al*, JRSS 1998. 161(1): p. 79-101.**

**clear**

**set more off**

**cap log close**

**version 15.1**

**cap program drop rri**

**program rri**

*** step 1: identify the best fitting model for mean and SD**

*** For the entire code 1=analyte, 2=age and 3=sex**

**xrigls `1' `2', nograph fp(m:df 4, s:df 4) centile(2.5 97.5) // xrigls is a user-defined package in Stata develped by P. Royston (JRSS 1998. 161(1): p. 79-101)**

**local m_fp `r(mpow)' // store the polynomial powers of age for the mean**

**local s_fp `r(spow)' // store the polynomial powers of age for the standard deviation**

**if "`m_fp'"=="" { // If no or linear association with age and constant SD**

**xriml `1' `2', dist(n) se centile(2.5 97.5) nograph noscaling // xriml is a user-defined package in Stata develped by P. Royston (JRSS 1998. 161(1): p. 79-101)**

**}**

**else {**

*** Step 2: Assess the difference in mean response by sex for the model**

*** using the best fitting power variables of age in the previous step**

**if strlen("`m_fp'") <= 2 { // if the 1-degree polynomials were identified for the mean**

**fp <`2'>, replace powers(`m_fp') dim(1): reg `1' `3' <`2'>**

**mat b = e(b) // store the estimates of b coefficients**

**mat se = e(V) // store the variance-covarience matrix**

**}**

**else if strlen("`m_fp'") > 2 { // if the 2-degree polynomials were identified for the mean**

**fp <`2'>, replace powers(`m_fp') dim(2): reg `1' `3' <`2'>**

**mat b = e(b)**

**mat se = e(V)**

**}**

**estimate store a // store the findings from the regression y = a + b1*age+b2*sex**

*** store the p-value corresponding to the b-coefficient of sex**

**local t_sex = b[1,1] / sqrt(se[1,1])**

**local p_sex = tprob(e(N)-2,`t_sex')**

**di `p_pex'**

*** Step 3: Is there an interaction between the age (selected degree of FP models) and sex ?**

***(so far the power variables selected in the -mfpi- were consistent with -mfp-)**

**reg `1' c.`2'_?##i.`3' // here `2'_? will recall the power variables of age i.e `m_fp'**

**estimate store b // store the findings from the regression y = a + b1*age+b2*sex+b3*age*sex**

**lrtest a b, stats // compare the two models with or without interaction term**

**local p_int `r(p)' // Ho: No difference in deviance between the model significant. Store the p-value**

**di `p_int'**

**if `p_sex' > 0.05 & `p_int' > 0.05 { // if both sex and interaction with sex is insignificant**

**if "`s_fp'"=="" { // if SD is constant**

**xriml `1' `2', dist(n) fp(m:`m_fp') se centile(2.5 97.5) nograph noscaling // normal distribution**

**local dev_n = 2*e(ll)**

**xriml `1' `2', dist(en) fp(m:`m_fp') se centile(2.5 97.5) nograph noscaling // exponential normal distribution**

**local dev_en = 2*e(ll)**

**xriml `1' `2', dist(men) fp(m:`m_fp') se centile(2.5 97.5) nograph noscaling // modulus exponential normal distribution**

**local dev_men = 2*e(ll)**

***Comparison of deviance between the 3 modeles**

**local diff1 = abs(`dev_n' - `dev_en')**

**local diff2 = abs(`dev_en' - `dev_men')**

**local p1 = 1-chi2(1,`diff1')**

**local p2 = 1-chi2(1,`diff2')**

*** Selection of the final model**

**if `p1' > 0.05 {**

**xriml `1' `2', dist(n) fp(m:`m_fp') se centile(2.5 97.5) nograph noscaling**

**}**

**else if (`p1' <.05) & (`p2' > .05) {**

**xriml `1' `2', dist(en) fp(m:`m_fp') se centile(2.5 97.5) nograph noscaling**

**}**

**else {**

**xriml `1' `2', dist(men) fp(m:`m_fp') se centile(2.5 97.5) nograph noscaling**

**}**

**}**

**else { // if s is a function of age**

**xriml `1' `2', dist(n) fp(m:`m_fp', s: `s_fp') se centile(2.5 97.5) nograph noscaling**

**local dev_n = 2*e(ll)**

**xriml `1' `2', dist(en) fp(m:`m_fp', s: `s_fp') se centile(2.5 97.5) nograph noscaling**

**local dev_en = 2*e(ll)**

**xriml `1' `2', dist(men) fp(m:`m_fp', s: `s_fp') se centile(2.5 97.5) nograph noscaling**

**local dev_men = 2*e(ll)**

**local diff1 = abs(`dev_n' - `dev_en')**

**local diff2 = abs(`dev_en' - `dev_men')**

**local p1 = 1-chi2(1,`diff1')**

**local p2 = 1-chi2(1,`diff2')**

**if `p1' > 0.05 {**

**xriml `1' `2', dist(n) fp(m:`m_fp', s: `s_fp') se centile(2.5 97.5) nograph noscaling**

**}**

**else if (`p1' <.05) & (`p2' > .05) {**

**xriml `1' `2', dist(en) fp(m:`m_fp', s: `s_fp') se centile(2.5 97.5) nograph noscaling**

**}**

**else {**

**xriml `1' `2', dist(men) fp(m:`m_fp', s: `s_fp') se centile(2.5 97.5) nograph noscaling**

**}**

**}**

**}**

**else if `p_sex' < 0.05 & `p_int' > 0.05 { // there is a difference by sex but not seperate by sex**

**if "`s_fp'"=="" { // if S is constant**

**xriml `1' `2', dist(n) fp(m:`m_fp') se centile(2.5 97.5) nograph noscaling covar(m:`3', s:`3')**

**local dev_n = 2*e(ll)**

**xriml `1' `2', dist(en) fp(m:`m_fp') se centile(2.5 97.5) nograph noscaling covar(m:`3', s:`3')**

**local dev_en = 2*e(ll)**

**xriml `1' `2', dist(men) fp(m:`m_fp') se centile(2.5 97.5) nograph noscaling covar(m:`3', s:`3')**

**local dev_men = 2*e(ll)**

**local diff1 = abs(`dev_n' - `dev_en')**

**local diff2 = abs(`dev_en' - `dev_men')**

**local p1 = 1-chi2(1,`diff1')**

**local p2 = 1-chi2(1,`diff2')**

**if `p1' > 0.05 {**

**xriml `1' `2', dist(n) fp(m:`m_fp') se centile(2.5 97.5) nograph noscaling covar(m:`3', s:`3')**

**}**

**else if (`p1' <.05) & (`p2' > .05) {**

**xriml `1' `2', dist(en) fp(m:`m_fp') se centile(2.5 97.5) nograph noscaling covar(m:`3', s:`3')**

**}**

**else {**

**xriml `1' `2', dist(men) fp(m:`m_fp') se centile(2.5 97.5) nograph noscaling covar(m:`3', s:`3')**

**}**

**}**

**else { // if s is a function of age**

**xriml `1' `2', dist(n) fp(m:`m_fp', s: `s_fp') se centile(2.5 97.5) nograph noscaling covar(m:`3', s:`3')**

**local dev_n = 2*e(ll)**

**xriml `1' `2', dist(en) fp(m:`m_fp', s: `s_fp') se centile(2.5 97.5) nograph noscaling covar(m:`3', s:`3')**

**local dev_en = 2*e(ll)**

**xriml `1' `2', dist(men) fp(m:`m_fp', s: `s_fp') se centile(2.5 97.5) nograph noscaling covar(m:`3', s:`3')**

**local dev_men = 2*e(ll)**

**local diff1 = abs(`dev_n' - `dev_en')**

**local diff2 = abs(`dev_en' - `dev_men')**

**local p1 = 1-chi2(1,`diff1')**

**local p2 = 1-chi2(1,`diff2')**

**if `p1' > 0.05 {**

**xriml `1' `2', dist(n) fp(m:`m_fp', s: `s_fp') se centile(2.5 97.5) nograph noscaling covar(m:`3', s:`3')**

**}**

**else if (`p1' <.05) & (`p2' > .05) {**

**xriml `1' `2', dist(en) fp(m:`m_fp', s: `s_fp') se centile(2.5 97.5) nograph noscaling covar(m:`3', s:`3')**

**}**

**else {**

**xriml `1' `2', dist(men) fp(m:`m_fp', s: `s_fp') se centile(2.5 97.5) nograph noscaling covar(m:`3', s:`3')**

**}**

**}**

**}**

**else if `p_int' < 0.05 { // seperately by sex**

***since its not possible to include interaction term in the model, RIs are estimated seperately by sex**

**if "`s_fp'"=="" { // if S is consistent**

**tempfile male female**

**preserve**

**keep if `3'==1**

**xriml `1' `2', dist(n) fp(m:`m_fp') se centile(2.5 97.5) nograph noscaling**

**local dev_n = 2*e(ll)**

**xriml `1' `2', dist(en) fp(m:`m_fp') se centile(2.5 97.5) nograph noscaling**

**local dev_en = 2*e(ll)**

**xriml `1' `2', dist(men) fp(m:`m_fp') se centile(2.5 97.5) nograph noscaling**

**local dev_men = 2*e(ll)**

**local diff1 = abs(`dev_n' - `dev_en')**

**local diff2 = abs(`dev_en' - `dev_men')**

**local p1 = 1-chi2(1,`diff1')**

**local p2 = 1-chi2(1,`diff2')**

**if `p1' > 0.05 {**

**xriml `1' `2', dist(n) fp(m:`m_fp') se centile(2.5 97.5) nograph noscaling**

**}**

**else if (`p1' <.05) & (`p2' > .05) {**

**xriml `1' `2', dist(en) fp(m:`m_fp') se centile(2.5 97.5) nograph noscaling**

**}**

**else {**

**xriml `1' `2', dist(men) fp(m:`m_fp') se centile(2.5 97.5) nograph noscaling**

**}**

**save `male', replace**

**restore**

**keep if `3'==0**

**xriml `1' `2', dist(n) fp(m:`m_fp') se centile(2.5 97.5) nograph noscaling**

**local dev_n = 2*e(ll)**

**xriml `1' `2', dist(en) fp(m:`m_fp') se centile(2.5 97.5) nograph noscaling**

**local dev_en = 2*e(ll)**

**xriml `1' `2', dist(men) fp(m:`m_fp') se centile(2.5 97.5) nograph noscaling**

**local dev_men = 2*e(ll)**

**local diff1 = abs(`dev_n' - `dev_en')**

**local diff2 = abs(`dev_en' - `dev_men')**

**local p1 = 1-chi2(1,`diff1')**

**local p2 = 1-chi2(1,`diff2')**

**if `p1' > 0.05 {**

**xriml `1' `2', dist(n) fp(m:`m_fp') se centile(2.5 97.5) nograph noscaling**

**}**

**else if (`p1' <.05) & (`p2' > .05) {**

**xriml `1' `2', dist(en) fp(m:`m_fp') se centile(2.5 97.5) nograph noscaling**

**}**

**else {**

**xriml `1' `2', dist(men) fp(m:`m_fp') se centile(2.5 97.5) nograph noscaling**

**}**

**append using `male'**

**}**

**else { // if s is a function of age**

**tempfile male female**

**preserve**

**keep if `3'==1**

**xriml `1' `2', dist(n) fp(m:`m_fp', s: `s_fp') se centile(2.5 97.5) nograph noscaling**

**local dev_n = 2*e(ll)**

**xriml `1' `2', dist(en) fp(m:`m_fp', s: `s_fp') se centile(2.5 97.5) nograph noscaling**

**local dev_en = 2*e(ll)**

**xriml `1' `2', dist(men) fp(m:`m_fp', s: `s_fp') se centile(2.5 97.5) nograph noscaling**

**local dev_men = 2*e(ll)**

**local diff1 = abs(`dev_n' - `dev_en')**

**local diff2 = abs(`dev_en' - `dev_men')**

**local p1 = 1-chi2(1,`diff1')**

**local p2 = 1-chi2(1,`diff2')**

**if `p1' > 0.05 {**

**xriml `1' `2', dist(n) fp(m:`m_fp', s: `s_fp') se centile(2.5 97.5) nograph noscaling**

**}**

**else if (`p1' <.05) & (`p2' > .05) {**

**xriml `1' `2', dist(en) fp(m:`m_fp', s: `s_fp') se centile(2.5 97.5) nograph noscaling**

**}**

**else {**

**xriml `1' `2', dist(men) fp(m:`m_fp', s: `s_fp') se centile(2.5 97.5) nograph noscaling**

**}**

**save `male', replace**

**restore**

**keep if `3'==0**

**xriml `1' `2', dist(n) fp(m:`m_fp', s: `s_fp') se centile(2.5 97.5) nograph noscaling**

**local dev_n = 2*e(ll)**

**xriml `1' `2', dist(en) fp(m:`m_fp', s: `s_fp') se centile(2.5 97.5) nograph noscaling**

**local dev_en = 2*e(ll)**

**xriml `1' `2', dist(men) fp(m:`m_fp', s: `s_fp') se centile(2.5 97.5) nograph noscaling**

**local dev_men = 2*e(ll)**

**local diff1 = abs(`dev_n' - `dev_en')**

**local diff2 = abs(`dev_en' - `dev_men')**

**local p1 = 1-chi2(1,`diff1')**

**local p2 = 1-chi2(1,`diff2')**

**if `p1' > 0.05 {**

**xriml `1' `2', dist(n) fp(m:`m_fp', s: `s_fp') se centile(2.5 97.5) nograph noscaling**

**}**

**else if (`p1' <.05) & (`p2' > .05) {**

**xriml `1' `2', dist(en) fp(m:`m_fp', s: `s_fp') se centile(2.5 97.5) nograph noscaling**

**}**

**else {**

**xriml `1' `2', dist(men) fp(m:`m_fp', s: `s_fp') se centile(2.5 97.5) nograph noscaling**

**}**

**append using `male'**

**}**

**}**

**}**

**end**

***B: Stata codes for Hoq et al’s method***

*** Developed by Monsurul Hoq for the purpose of the comparing four methods for estimating continuous RI.**

*** The following program is applicable for estimating RIs (2.5th - 97.5th) using age and sex (where 1 = Male and 0 = Female).**

*** A brief discussion of the method is include in the masnucript.**

*** Further details can be found in Hoq *et al*, Clin Chem 2019 65(10).**

**clear**

**set more off**

**cap log close**

**version 15.1**

**cap program drop ri**

**program ri**

*** Regress the mean of y on age and sex to identify the best fitting power variable of age**

*** For the entire code 1=analyte, 2=age and 3=sex**

**mfp, center(no, `2':mean): reg `1' `2' `3'**

**local pw `e(fp_k1)' // store selected powers of age for the mean**

*** Is the difference in mean response by sex significant ?**

**mat b = e(b) // store the estimates of b coefficients**

**mat se = e(V) // store the variance-covarience matrix**

**local col = `e(rank)'-1 // to understand the position of the sex variable in the model**

*** store the p-value corresponding to the b-coefficient of sex**

**local t_sex = b[1,`col'] / sqrt(se[`col',`col'])**

**local p_sex = tprob(e(N)-2,`t_sex')**

*** Is there an interaction between the age (selected powers) and sex ?**

*** For a linear model**

**if "`pw'"=="1" { // `pw' stores the power variables as string**

**mfpi reg `1' `2', showmodel with(`3') linear(`2')**

**local p_int `r(Plin)' // Ho: No difference in deviance between the model significant. Store the p-value**

**}**

*** For a 1-Degree Fractional Polynomial model**

**else if strlen("`pw'") <= 2 {**

**mfpi reg `1' `2', showmodel with(`3') fp1(`2')**

**local p_int `r(Pfp1)'**

**}**

*** For a 2-Degree Fractional Polynomial model**

**else if strlen("`pw'") > 2 {**

**mfpi reg `1' `2', showmodel with(`3') fp2(`2')**

**local p_int `r(Pfp2)'**

**}**

**if `p_sex' > 0.05 & `p_int' > 0.05 { // both sex and interaction with sex is insignificant**

**fp <`2'>, fp("`pw'") replace all : reg `1' <`2'> // This will generate the power variables of age (age_?)**

***estimate the RIs (i.e. upper and lower limits) applying quantile regression where power variables of age are the covriates**

**qreg `1' `2'_?, quantile(2.5) vce(,bof)**

**predict `1'_ll**

**predict `1'_ll_se1, stdp**

**qreg `1' `2'_? , quantile(97.5) vce(,bof)**

**predict `1'_ul**

**predict `1'_ul_se1, stdp**

**}**

**else if `p_sex' < 0.05 & `p_int' > 0.05 { // there is a difference by sex but not seperate by sex**

**fp <`2'>, fp("`pw'") replace all : reg `1' i.`3' <`2'>**

**qreg `1' `2'_? i.`3', quantile(2.5) vce(,bof)**

**predict `1'_ll**

**predict `1'_ll_se1, stdp**

**qreg `1' `2'_? i.`3', quantile(97.5) vce(,bof)**

**predict `1'_ul**

**predict `1'_ul_se1, stdp**

**}**

**else if `p_int' < 0.05 { // seperate by sex**

**fp <`2'>, fp("`pw'") replace all : reg `1' i.`3' <`2'>**

**qreg `1' c.`2'_?##i.`3', quantile(2.5) vce(,bof)**

**predict `1'_ll**

**predict `1'_ll_se1, stdp**

**qreg `1' c.`2'_?##i.`3', quantile(97.5) vce(,bof)**

**predict `1'_ul**

**predict `1'_ul_se1, stdp**

**}**

**end**

***1-C: State code for Cole’s LMS method***

*** The following code from ZWANG was update by Monsurul Hoq to select the EDF based on a cross-validation.**

***! version 0.1 ZWANG Nov 1998, Menzies School of Health Research**

***! version 0.2 M.S. Pearce Nov 1998, Child Health, University of Newcastle**

*** upon Tyne**

**cap program drop colelms2_cx**

**program define colelms2_cx**

**version 5.0**

**local varlist "req ex min(1) max(1)"**

**#delimit ;**

**local options "AGEgroup(string) SEX(string) df(string)**

**NOSmooth CENtile(string) save(string) ";**

**#delimit cr**

**parse "`*'"**

**parse "`varlist'", parse(" ")**

**tempvar xlog xrec mg mh ma sg sa sh A B sd sdlog sdr**

**if "`centile'"=="" {local centile "2.5 10 25 50 75 90 97.5"}**

**gen `xlog'=ln(`1')**

**gen `xrec'=1/`1'**

**local GM "`1'"**

**if "`save'"==""{local save "LMStemp"}**

**if "`sex'"!=""{**

**# delimit ;**

**collapse (mean) "`1'" `xlog' `xrec' (sd) sd="`1'" `sdlog'=`xlog'**

**`sdr'=`xrec' (count) num=`1', by(`sex' `agegroup');**

**# delimit cr**

**}**

**if "`sex'"==""{**

**# delimit ;**

**collapse (mean) "`1'" `xlog' `xrec' (sd) sd="`1'" `sdlog'=`xlog'**

**`sdr'=`xrec' (count) num=`1', by(`agegroup');**

**# delimit cr**

**}**

**gen `mg'=exp(`xlog')**

**gen `mh'=1/`xrec'**

**gen `ma'=`1'**

**gen `sg'=`sdlog'**

**gen `sa' =sd/`mg'**

**gen `sh'=`sdr'*`mg'**

**gen `A'=ln(`sa' /`sh')**

**gen `B'=ln((`sa' *`sh')/(`sg'^2))**

**qui {**

**gen L=-`A'/(2*`B')**

**gen S=`sg'*exp(`A'*L/4)**

**gen M=`mg'+(`ma'-`mh')*L/2+(`ma'-2*`mg'+`mg')*(L^2)/2**

*** Cross-validation to select the optimum EDF for fitting a model for mu**

**forvalue i = 1/18 {**

**forvalue o = 0/1 {**

**forvalue b = 2/6 {**

*** Drop each interage age at a time and estimate the model using the reamining age and mean for df = 2 - 6**

**gam M `agegroup' if `sex'==`o' & `agegroup'!=`i', df(`b')**

**rename GAM_mu MS1m`i'`o'`b'**

**}**

**}**

**}**

**gen diff2 = .**

**gen diff3 = .**

**gen diff4 = .**

**gen diff5 = .**

**gen diff6 = .**

*** Calcuate the error in predicting the new data**

**forvalue i = 2/17 {**

**forvalue o = 0/1 {**

**forvalue b = 2/6 {**

**local j = `i'-1**

**local k = `i'+1**

**sum MS1m`i'`o'`b' if inlist(age, `j' , `k') & sex==`o'**

**replace MS1m`i'`o'`b' = r(mean) if age==`i' & sex==`o'**

**replace diff`b' = M - MS1m`i'`o'`b' if age==`i' & sex==`o'**

**}**

**}**

**}**

*** identify the EDF between 2 and 6 with minimum error in predicting the mean**

**forvalue i = 2/6 {**

**gen diff_s`i' = sqrt((diff`i')^2)**

**sum diff_s`i'**

**}**

**preserve**

**collapse (mean) diff_s?**

**gen id=1**

**reshape long diff_s, i(id)**

**sort diff_s**

**local df = _j[1]**

**di "`df'"**

**restore**

*** use the the identified EDF for calculating the centiles**

**if "`nosmooth'"==""{**

**if "`sex'"==""{**

**gam L `agegroup', df(`df')**

**gen LS=GAM**

**gam M `agegroup', df(`df')**

**gen MS=GAM**

**gam S `agegroup', df(`df')**

**gen SS=GAM**

**}**

**if "`sex'"!=""{**

**quietly summ `sex'**

**local one=_result(5)**

**local two=_result(6)**

**gam L `agegroup' if `sex'==`one', df(`df')**

**gen LS=GAM if `sex'==`one'**

**gam L `agegroup' if `sex'==`two', df(`df')**

**replace LS=GAM if `sex'==`two'**

**gam M `agegroup' if `sex'==`one', df(`df')**

**gen MS=GAM if `sex'==`one'**

**gam M `agegroup' if `sex'==`two', df(`df')**

**replace MS=GAM if `sex'==`two'**

**gam S `agegroup' if `sex'==`one', df(`df')**

**gen SS=GAM if `sex'==`one'**

**gam S `agegroup' if `sex'==`two', df(`df')**

**replace SS=GAM if `sex'==`two'**

**}**

**lab var LS "L smoothed"**

**lab var MS "M smoothed"**

**lab var SS "S smoothed"**

**drop s_ r_ e_ GAM**

**parse "`centile'", parse(" ")**

**while "`1'" !="" {**

**local tcent = `1'/100**

**local new = subinstr("`1'", ".", "x",.)**

**local Z`new' = invnorm(`tcent')**

**gen C`new' = MS*((1+LS*SS*`Z`new'')^(1/LS))**

**mac shift**

**}**

**}**

**}**

**end**

***1- D: R code for GAMLSS***

The following steps were applied to estimate RIs using GAMLSS method.

rm(list=ls())

#setwd("Y:/PhD/Simulation/ALP")

**#call the packages**

library(gamlss)

library(haven)

library(MASS)

source("extract_centiles.R")

SS=c(100,200,400,1000)

for (k in 1:4) {

for (i in 1:1000) {

S=Sys.time()

tryCatch(

{

print(i)

**# reading the data**

datafile1 <-read_stata(paste0("Data/",SS[k],"/size",SS[k],"_sim",i,".dta"))

alp_all <- subset(datafile1, select=c(age,sex,alp))

alp_all0 <- na.omit(alp_all)

alp_all0$alp[alp_all0$alp<1]<-1

alp_all0$id<-1:nrow(alp_all0)

**# finding the hyper parameters for mean and SD i.e. edf for model including age and sex**

m1 <- quote(gamlss(alp~cs(age,df=p[1])+as.factor(sex), data=alp_all0, family=BCT(), control=gamlss.control(trace=FALSE)))

op <-find.hyper(model=m1, par=c(3), lower=c(1), steps=c(.1), k=log(SS[k]))

m2 <- gamlss(alp~cs(age,df=op$par[1])+as.factor(sex),data=alp_all0, family=BCT())

**# assess the difference in mean by sex**

m3<-stepGAIC.VR(m2)

m3$anova

**# assess the interaction between age and sex**

m4<-stepGAIC.VR(m2, scope=list(lower=~cs(age,df=op$par[1]), upper=~(cs(age,df=op$par[1])+as.factor(sex))^2))

m4$anova

**# assess the difference in SD by sex**

m5<-stepGAIC.VR(m4, what="sigma",scope=~(cs(age,df=op$par[1])+as.factor(sex)))

m5$anova

**# Find the hyper parameter for mean and SD for the selected model**

m6 <- quote(gamlss(m4$mu.formula,sigma.fo=m5$sigma.formula, data=alp_all0, family=BCT(), control=gamlss.control(trace=FALSE)))

op <-find.hyper(model=m6, par=c(3,3), lower=c(1,1), steps=c(.1,.1), k=log(SS[k]))

m7 <- gamlss(m4$mu.formula,sigma.fo=m5$sigma.formula,data=alp_all0, family=BCT())

**# calculate the centile**

o1<-extract_centiles(m7,xvar=alp_all0$age,idvar=alp_all0$id,groupvar = alp_all0$sex, col.cent=1,

cent=c(2.5,97.5),

lty.centiles=c(3,3, 2,2,1,2, 2,3, 3),

lwd.cent=c(1,1,1.5,1.5,2,1.5,1.5,1,1),

ylab = "ALP",

xlab = "Age (years)",

legend = F,

xlim = c(min(alp_all0$age),18),

save=F,

las=1)

results<-read.csv("Coordinates for selected percentiles.csv" )

write.csv(results,paste0("Results/",SS[k],"/methods5_size",SS[k],"_sim",i,".csv"), row.names = FALSE)

}, error=function(e){})

}

}
